# Supplementary material for: SATB1 plays an oncogenic role in esophageal cancer by up-regulation of FN1 and PDGFRB
Source: PubMed Central journal article supplement (PMC5392285; doi:10.18632/oncotarget.14849), 2017-01-27
Supplement: oncotarget-08-17771-s001.pdf [file oncotarget-08-17771-s001.pdf]

## SATB1 plays an oncogenic role in esophageal cancer by up-regulation of FN1 and PDGFRB

### Supplementary Materials

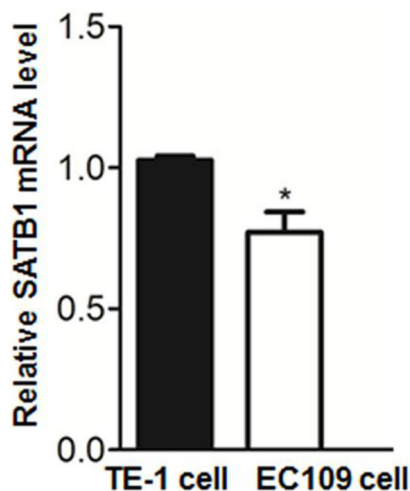

Supplementary Figure 1: Endogenous SATB1 mRNAs level in esophageal squamous cell carcinoma TE-1 and EC109 cells detected by qPCR.

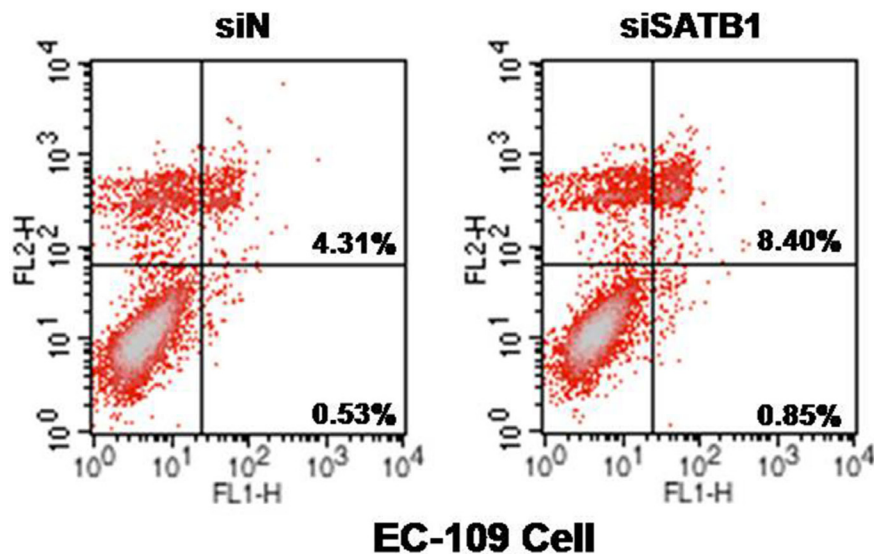

Supplementary Figure 2: Flow cytometry was performed to analyze the cell apoptosis. FL1-H is annexin V and FL2-H is PI.

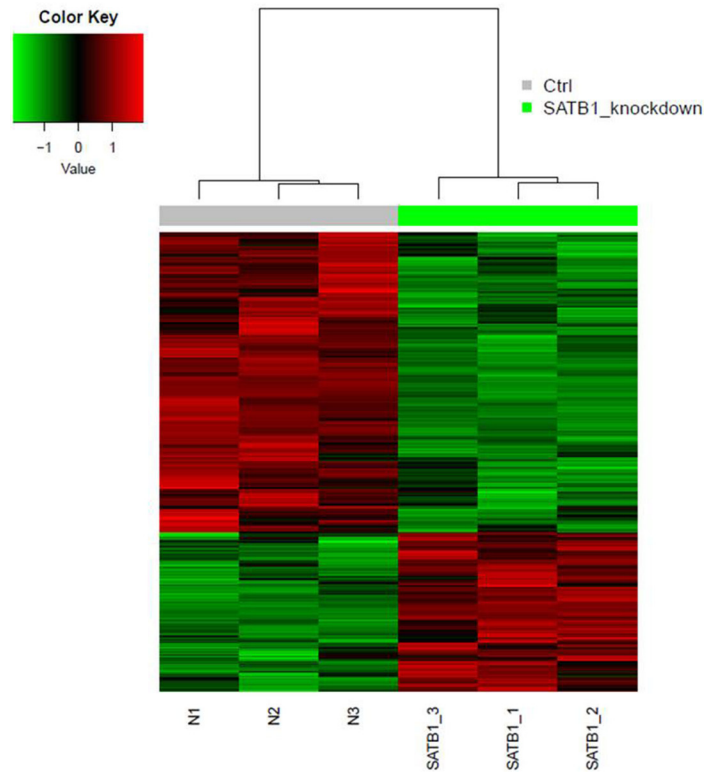

Supplementary Figure 3: Heat map of gene expression levels (green = low expression, red = high expression) for SATB1 knockdown TE-1 cells.

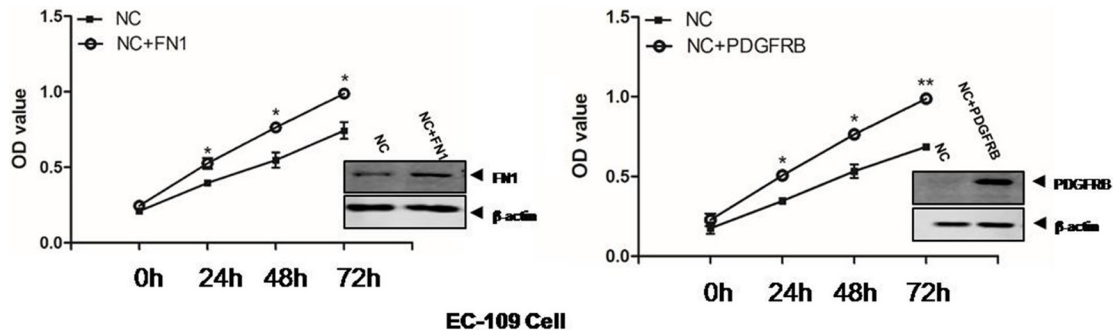

Supplementary Figure 4: MTT assay was employed to measure the cell proliferation in EC-109 cells after overexpression FN1, left panel or overexpression PDGFRB, right panel.

**Supplementary Table 1: Up regulated genes in Comparison 1, 2 or 3 ( $|\log_2(\text{fold change})| > 0.5$  & adjusted  $p$  value  $< 0.05$ ).**  
See Supplementary\_Table\_1

**Supplementary Table 2: Down regulated genes in Comparison 1, 2 or 3 ( $|\log_2(\text{fold change})| > 0.5$  & adjusted  $p$  value  $< 0.05$ ).**  
See Supplementary\_Table\_2
